# Supplementary material for: Transforming lignin into porous graphene via direct laser writing for solid-state supercapacitors
Source: Royal Society of Chemistry journal article supplement (doi:10.1039/c9ra04073k), 2019-01-01
Supplement: c9ra04073k1.pdf [file c9ra04073k1.pdf]

## Supporting information

### Transforming Lignin into Porous Graphene via Direct Laser Writing for Solid-State Supercapacitors

Faisal Mahmood <sup>a,d</sup>, Chi Zhang <sup>b</sup>, Yunchao Xie <sup>b</sup>, David Stalla <sup>c</sup>, Jian Lin <sup>b</sup>, Caixia Wan <sup>a,\*</sup>

<sup>a</sup> Department of Biomedical, Biological, and Chemical Engineering, University of Missouri, Columbia 65211, USA

<sup>b</sup> Department of Mechanical and Aerospace Engineering, University of Missouri, Columbia 65211, USA

<sup>c</sup> Electron Microscopy Core, University of Missouri, Columbia 65211, USA

<sup>d</sup> Department of Energy Systems Engineering, University of Agriculture Faisalabad, Faisalabad 38000, Pakistan

\*Corresponding author: Phone: +1 573 884 7882; Fax: +1 573 884 5650; E-mail: [wanca@missouri.edu](mailto:wanca@missouri.edu)

### Contents

|                                                                                                                                                                                                                                                                                                                                                                                                                                                                                                                                                                                    |   |
|------------------------------------------------------------------------------------------------------------------------------------------------------------------------------------------------------------------------------------------------------------------------------------------------------------------------------------------------------------------------------------------------------------------------------------------------------------------------------------------------------------------------------------------------------------------------------------|---|
| <b>Fig. S1</b> (a) SEM image of porous LIG-80 embedded on a lignin/PEO film, scale bar is 2 $\mu\text{m}$ . (b) A higher magnification of SEM image of the white square region in (a), showing a beehive-like porous structure, scale bar is 500 nm. ....                                                                                                                                                                                                                                                                                                                          | 2 |
| <b>Fig. S2</b> SEM images of LIG obtained at the power levels of 50% and 70%. (a-c) LIG-50 obtained at 50% power level. (d-f) LIG-70 obtained at 70% power level. The scale bars: (a, d) 50 $\mu\text{m}$ , (b, e) 10 $\mu\text{m}$ , and (c, f) 2 $\mu\text{m}$ . ....                                                                                                                                                                                                                                                                                                            | 3 |
| <b>Fig. S3</b> TEM images of LIG obtained at the power levels of 50% and 70%. (a-c) LIG-50 obtained at 50% power level. (d-f) LIG-70 obtained at 70% power level. The scale bars: (a, d) 0.5 $\mu\text{m}$ , (b, e) 100 nm, and (c, f) 20 nm. ....                                                                                                                                                                                                                                                                                                                                 | 4 |
| <b>Fig. S4</b> XRD analysis of LIG-80. Survey scans were conducted at $2\theta$ of 0-50° with a scan rate of 0.6s/0.02°. Detailed analysis of LIG-80 (shown in the inset and XRD pattern in red) was conducted at $2\theta$ of 17-26° with a scan rate of 12s/0.02°. LIG-80 embedded on the lignin/PEO film was used for analysis, and the pristine lignin/PEO film (non-irradiated) used as a control. The presence of the characteristic peaks of PEO in the XRD pattern for LIG-80 suggests that the lignin/PEO film below embedded LIG could interfere with the analysis. .... | 5 |
| <b>Fig. S5</b> XPS survey spectra of the lignin/PEO film and LIG-80. LIG embedded on the lignin/PEO film was used for XPS spectroscopy, and the pristine lignin/PEO film used as a control. ....                                                                                                                                                                                                                                                                                                                                                                                   | 6 |
| <b>Fig. S6</b> Electrochemical analysis of LIG-50-SC and LIG-70-SC. (a) CV curves of LIG-50-SC at different scan rates. (b) CV curves of LIG-70-SC at different scan rates. (c) Specific areal capacitance ( $C_A$ ) as a function of scan rate. (d) CD curves of LIG-50-SC at different discharge current densities. (e) CD curves of LIG-70-SC at different discharge current densities. (f) Specific areal capacitance ( $C_A$ ) as a function of discharge current density. ....                                                                                               | 7 |
| <b>Fig. S7</b> (a, b) Specific volumetric ( $C_V$ ) capacitances calculated from LIG-80-SC as a function of scan rate and current density, respectively. (c, d) Ragone plots of LIG-80-SC. ....                                                                                                                                                                                                                                                                                                                                                                                    | 8 |

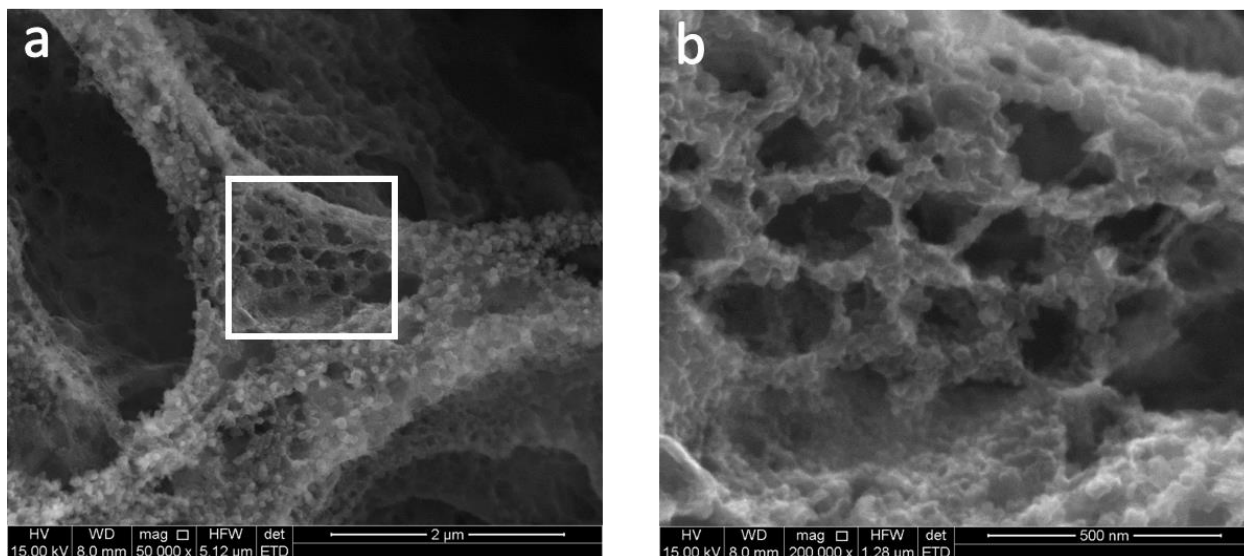

**Fig. S1** (a) SEM image of porous LIG-80 embedded on a lignin/PEO film, scale bar is 2 μm. (b) A higher magnification of SEM image of the white square region in (a), showing a beehive-like porous structure, scale bar is 500 nm.

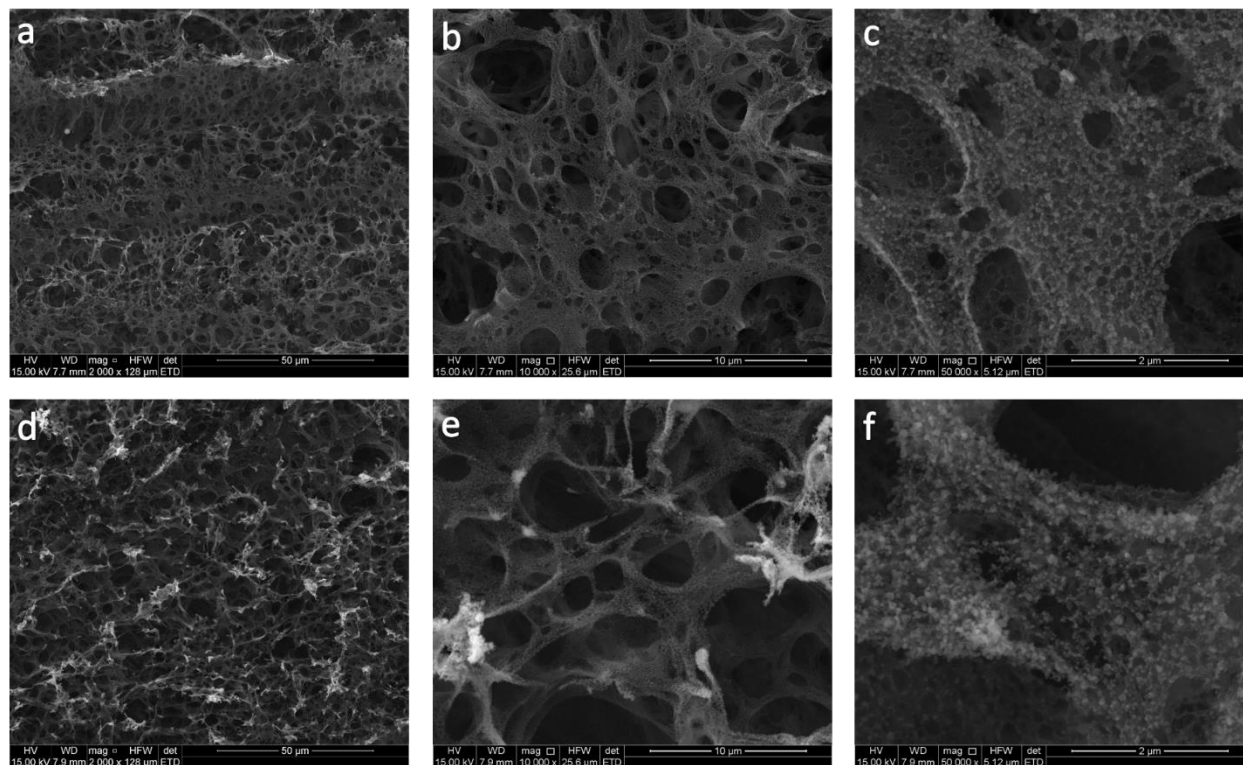

**Fig. S2** SEM images of LIG obtained at the power levels of 50% and 70%. (a-c) LIG-50 obtained at 50% power level. (d-f) LIG-70 obtained at 70% power level. The scale bars: (a, d) 50  $\mu\text{m}$ , (b, e) 10  $\mu\text{m}$ , and (c, f) 2  $\mu\text{m}$ .

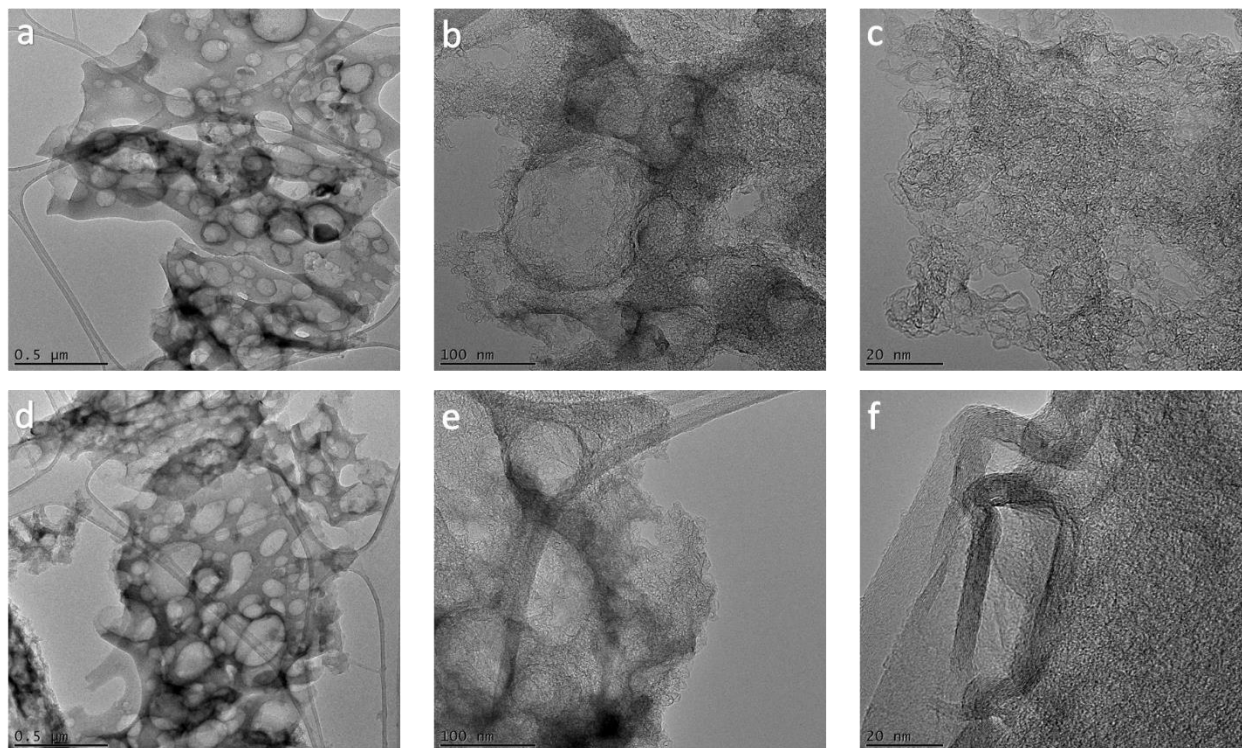

**Fig. S3** TEM images of LIG obtained at the power levels of 50% and 70%. (a-c) LIG-50 obtained at 50% power level. (d-f) LIG-70 obtained at 70% power level. The scale bars: (a, d) 0.5  $\mu\text{m}$ , (b, e) 100 nm, and (c, f) 20 nm.

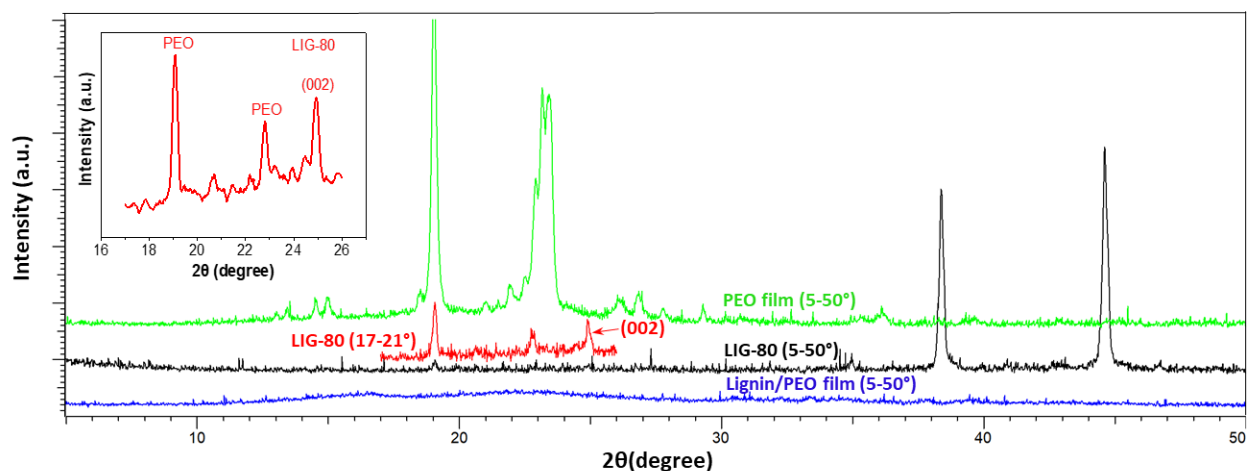

**Fig. S4** XRD analysis of LIG-80. Survey scans were conducted at  $2\theta$  of  $0-50^\circ$  with a scan rate of  $0.6\text{s}/0.02^\circ$ . Detailed analysis of LIG-80 (shown in the inset and XRD pattern in red) was conducted at  $2\theta$  of  $17-26^\circ$  with a scan rate of  $12\text{s}/0.02^\circ$ . LIG-80 embedded on the lignin/PEO film was used for analysis, and the pristine lignin/PEO film (non-irradiated) used as a control. The presence of the characteristic peaks of PEO in the XRD pattern for LIG-80 suggests that the lignin/PEO film below embedded LIG could interfere with the analysis.

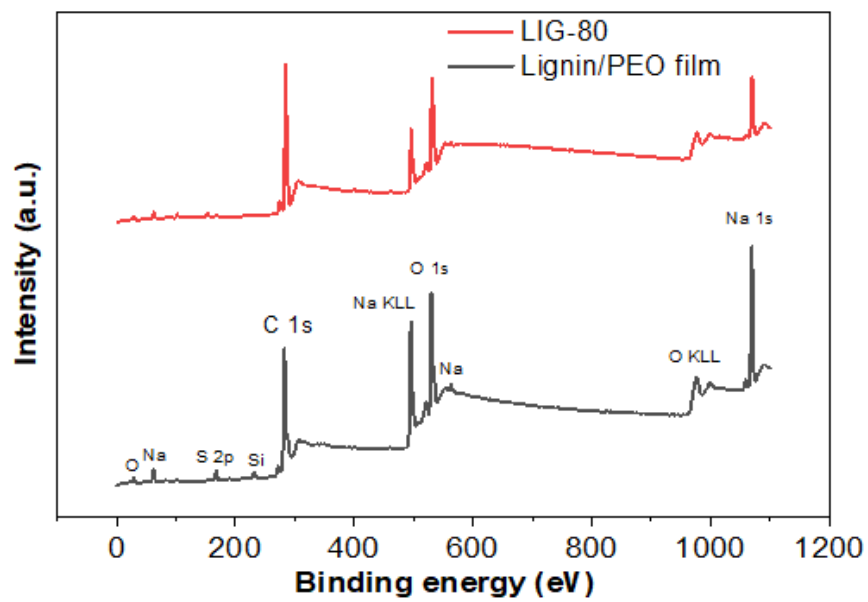

**Fig. S5** XPS survey spectra of the lignin/PEO film and LIG-80. LIG embedded on the lignin/PEO film was used for XPS spectroscopy, and the pristine lignin/PEO film used as a control.

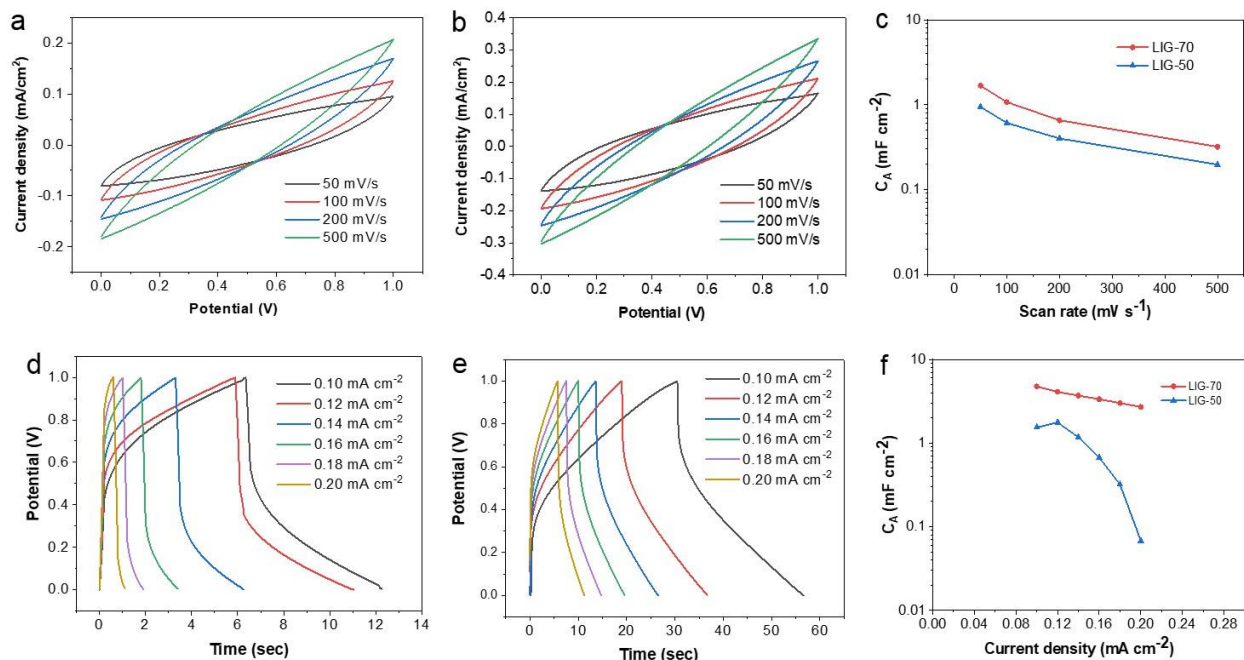

**Fig. S6** Electrochemical analysis of LIG-50-SC and LIG-70-SC. (a) CV curves of LIG-50-SC at different scan rates. (b) CV curves of LIG-70-SC at different scan rates. (c) Specific areal capacitance ( $C_A$ ) as a function of scan rate. (d) CD curves of LIG-50-SC at different discharge current densities. (e) CD curves of LIG-70-SC at different discharge current densities. (f) Specific areal capacitance ( $C_A$ ) as a function of discharge current density.

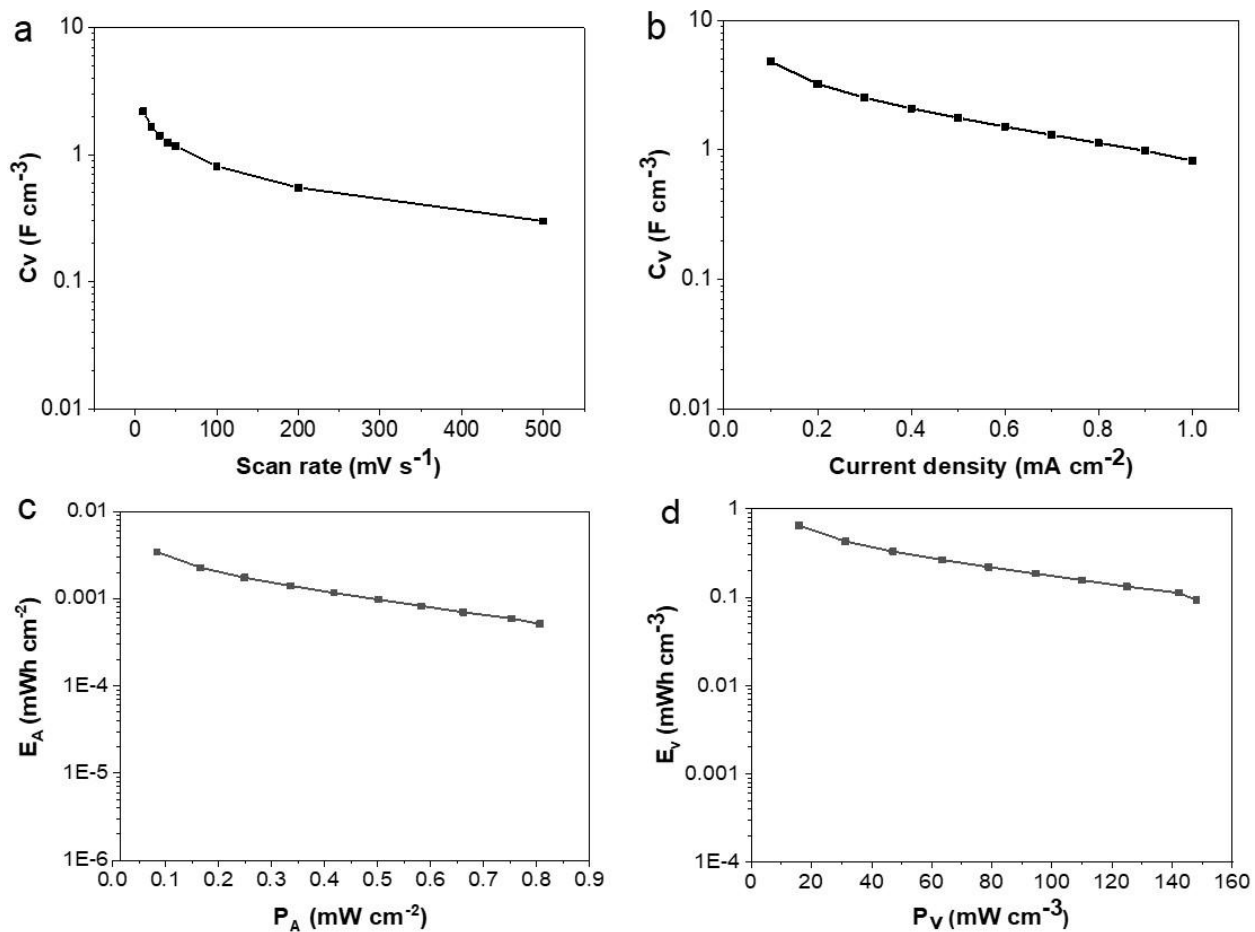

**Fig. S7** (a, b) Specific volumetric ( $C_v$ ) capacitances calculated from LIG-80-SC as a function of scan rate and current density, respectively. (c, d) Ragone plots of LIG-80-SC.
